# Supplementary material for: Electroreduction of CO2 to syngas with controllable H2/CO ratios in a wide potential range over Ni–N co-doped ultrathin carbon nanosheets
Source: Royal Society of Chemistry journal article supplement (doi:10.1039/d3qi00108c), 2023-01-01
Supplement: d3qi00108c1.pdf [file d3qi00108c1.pdf]

## Supporting Information

### **Electroreduction of CO<sub>2</sub> to syngas with controllable H<sub>2</sub>/CO ratios in a wide potential range over Ni-N co-doped ultrathin carbon nanosheets**

*Kaining Gan, Hongqiang Li\*, Ran Li, Jiabao Niu, Jun He, Dedong Jia, Xiaojun He\**

K. Gan, H. Li, R. Li, J. Niu, J. He, D. Jia, X. He

School of Chemistry and Chemical Engineering

Anhui Key Laboratory of Coal Clean Conversion and High Valued Utilization

Key Laboratory of Metallurgical Emission Reduction & Resources Recycling, Ministry of Education

Anhui University of Technology

Maanshan 243002, P. R. China

E-mail: hqli2020@ahut.edu.cn; xjhe@ahut.edu.cn

## Table of Contents

|                                                                                                                                                                                   |           |
|-----------------------------------------------------------------------------------------------------------------------------------------------------------------------------------|-----------|
| <b>1. Supplementary Materials and Methods</b> .....                                                                                                                               | <b>1</b>  |
| 1.1 Chemicals and reagents.....                                                                                                                                                   | 1         |
| 1.2 Catalyst preparation .....                                                                                                                                                    | 1         |
| 1.3 Characterizations.....                                                                                                                                                        | 2         |
| 1.4 Cathode preparation .....                                                                                                                                                     | 2         |
| 1.5 Electrochemical measurements .....                                                                                                                                            | 3         |
| <b>2. Supplementary figures</b> .....                                                                                                                                             | <b>4</b>  |
| <b>Fig. S1</b> SEM images of Ni-C and N-C .....                                                                                                                                   | <b>4</b>  |
| <b>Fig. S2</b> X-ray diffraction patterns and Raman spectra of Ni/N-C-900, Ni-C and N-C .....                                                                                     | <b>4</b>  |
| <b>Fig. S3</b> XPS survey spectra of all samples .....                                                                                                                            | <b>5</b>  |
| <b>Fig. S4</b> C 1S XPS spectra of all samples .....                                                                                                                              | <b>5</b>  |
| <b>Fig. S5</b> The percentage of different N species in Ni/N-C-700, 800, 900 and 1000.....                                                                                        | <b>6</b>  |
| <b>Fig. S6</b> High resolution XPS Ni 2p and N 1S spectra of Ni-C and N-C .....                                                                                                   | <b>7</b>  |
| <b>Fig. S7</b> Comparison of Ni/N-C-900, Ni-C and N-C for the electrocatalytic reduction of CO <sub>2</sub> .....                                                                 | <b>8</b>  |
| <b>Fig. S8</b> Tafel plots based on $j_{\text{co}}$ for Ni/N-C-900, Ni-C and N-C .....                                                                                            | <b>9</b>  |
| <b>Fig. S9</b> Scanning rates and the plot of charging current density differences $\Delta j$ against the scan rate for the calculation of ECSA of Ni/N-C-700, 800 and 1000 ..... | <b>10</b> |
| <b>Fig. S10</b> Scanning rates and the plot of charging current density differences $\Delta j$ against the scan rate for the calculation of ECSA of Ni/N-C-900, Ni-C and N-C..... | <b>11</b> |
| <b>Fig. S11</b> ECSA-normalised $j_{\text{co}}$ of Ni/N-C-900, Ni-C and N-C.....                                                                                                  | <b>12</b> |
| <b>Fig. S12</b> Isotopic composition of CO .....                                                                                                                                  | <b>13</b> |
| <b>Fig. S13</b> Comparison of N species in Ni/N-C-900 before and after test .....                                                                                                 | <b>13</b> |
| <b>2. Supplementary tables</b> .....                                                                                                                                              | <b>14</b> |
| <b>Table. S1</b> Summary of Ni content in different catalysts determined by XPS .....                                                                                             | <b>14</b> |
| <b>Table. S2</b> ICP-OES measurements for Ni weight percent .....                                                                                                                 | <b>14</b> |

## **Chemicals and reagents**

All chemicals were of analytical grade and used without further treatments. Medium temperature coal tar pitch was provided by Maanshan Iron and Steel Co., Ltd. Nickel (II) chloride hexahydrate, potassium chloride, potassium hydrogen carbonate, urea, sodium chloride, ethanol absolute, hydrochloric acid, and nitric acid were obtained from Sinopharm Chemical Reagent Co., Ltd. Nafion solution (5.0 wt%) was purchased from Sigma-Aldrich and N-117 membranes were provided by Shanghai Chuxi Industrial Co., Ltd. Deionized water ( $\geq 15$  megohm $\cdot$ cm) was obtained from Hefei Jingchun Water Sales Co., Ltd.

## **Catalyst preparation**

### **Synthesis of Ni/N-C-900 catalysts**

In a typical synthesis, 1 g of medium-temperature coal tar pitch and 30 g of mixed salt ( $M_{\text{NaCl}}/M_{\text{KCl}}=1$ ) were mixed with a mortar, and then put into a porcelain boat and heated at 1000 °C for 2 h under Ar atmosphere in a tube furnace with a heating rate of 5°C/min. After cooling to room temperature, the sample was added to concentrated nitric acid, condensed, and refluxed at 70°C for 4 h, and then washed with deionized water until neutral and dried. The dried samples were dispersed in a 3 mg/mL NiCl<sub>2</sub> solution, stirred uniformly for 12 h, and mixed with 10 g of urea with a mortar after filtration and drying. It was placed in a porcelain boat and re-carbonization at 900 °C for 2 h under Ar atmosphere in a tube furnace with a heating rate of 5°C/min. After cooling down to room temperature, the samples were dispersed in 3 M HCl solution and stirred for 12 h. Ni/N-C-900 powder was obtained after filtration with deionized water and drying in a vacuum oven at 60°C overnight.

### **Synthesis of Ni/N-C-700, 800, and 1000 catalysts**

The samples were prepared using a similar identical procedure, and only were heat-treated at 700°C, 800°C, and 1000°C in the re-carbonization process.

### **Synthesis of N-C and Ni-C catalysts**

Nitrogen-doped carbon (N-C) and metallic Ni nanoparticles decorated carbon (Ni-C) were prepared through the similar synthesis route with Ni/N-C-900, which N-C is not

doped with nickel, and Ni-C is not doped with nitrogen.

### **Characterization**

The crystalline and graphitization degrees of various samples were investigated by X-ray diffraction (XRD, Ultima IV) and Raman spectroscopy (JYLab-Raman HR800), respectively. The morphologies of the as-prepared products were obtained from a scanning electron microscope (SEM, TESCAN MIRA LMS, Czech). Transmission electron microscopy, and the corresponding energy-dispersive X-ray (EDX) mapping were recorded using a transmission electron microscope (TEM, JEOL-2100). X-ray photoelectron spectroscopy (XPS) was measured using a high-performance electron spectrometer equipped with the excitation source of monochromatic Al-K $\alpha$  radiation ( $h\nu = 1486.6$  eV) (Thermo Scientific K-Alpha). **Specifically, we have controlled the consistency of the FWHM (1.2-1.3) in each separated peak and set the value of %Lorentzian-Gaussian to 80 in deconvolution process (XPS fitting Software: XPSPEAK41).** Ni contents were recorded on an inductively coupled plasma atomic emission spectrometer (ICP-PMS) (Agilent 7700).

### **Cathode preparation**

Electrochemical measurements were carried out by using an electrochemical workstation (CHI 760E) coupled with a three-electrode H-cell with a working electrode, a saturated Ag/AgCl reference electrode, and a platinum foil as a counter electrode. To prepare the working electrode, 5.0 mg of catalyst was ultrasonically dispersed in a 500  $\mu$ L Deionized water, 470  $\mu$ L absolute ethanol and Nafion solution (5 wt.%, 30  $\mu$ L) solution to form homogeneous ink. Then, 10  $\mu$ L of catalyst ink was drop-cast onto a 0.19625 cm<sup>2</sup> glassy carbon electrode and dried naturally to obtain a working electrode. In the case of H cells, each compartment was filled with 80 mL of 0.1 M KHCO<sub>3</sub>, and the two compartments were separated by a piece of Nafion-117 membrane. To prepare a CO<sub>2</sub>-saturated KHCO<sub>3</sub> solution, flow 20 mL min<sup>-1</sup> of CO<sub>2</sub> (99.999%) for 30 min using a mass flow controller (D08-4B/ZM). A continuous flow

of CO<sub>2</sub> was introduced into the cell at a similar flow rate throughout the test. Cyclic voltammetry (CV) was repeated before other tests until a stable CV curve was observed.

### **Electrochemical measurements**

The experiments were performed in a gas-tight H-type cell separated by a Nafion N117 membrane. Each compartment contained 80 mL electrolyte (0.1 M KHCO<sub>3</sub> aqueous solution). The electrocatalytic performance of samples were test in Ar (99.999%)-saturated or CO<sub>2</sub> (99.999%)-saturated 0.1 M KHCO<sub>3</sub> with Pt foil (1 cm<sup>2</sup>) as the counter electrode and Ag/AgCl (saturated KCl) as the reference electrode.

All potentials in the experiments were measured against an Ag/AgCl reference electrode and rescaled to reversible hydrogen electrode (RHE):

$$E (vs . RHE) = E (vs . Ag/AgCl) + 0.197V + 0.0591 \times pH$$

During the experiments, CO<sub>2</sub> gas was delivered at an average flow rate of 20 sccm.

Electrocatalytic CO<sub>2</sub> reduction was conducted in CO<sub>2</sub>-saturated KHCO<sub>3</sub> solution (0.1 M) at room temperature and atmospheric pressure. CO<sub>2</sub> was purged into the KHCO<sub>3</sub> solution for at least 30 min to remove residual air in the electrolyze. Linear sweep voltammograms in Ar- or CO<sub>2</sub> atmosphere were carried out in a three-electrode system using Ag/AgCl as reference electrode, Pt wire as counter electrode, and glassy carbon as working electrode on a CHI 760E potentiostat (CHI 760E, Shanghai CH Instruments Co., China). The electrolyte is 0.1 M KHCO<sub>3</sub> solution with Ar or CO<sub>2</sub> purged for at least 30 min. For the faradaic efficiency analysis, gas products were detected by gas chromatograph (GC-2014. SHIMADZU).

ECSA was calculated based on the definition:

$$ECSA = R_f \times S$$

Where  $R_f$  is roughness factor that estimated from the ratio of the  $C_{dl}$  values of catalyst and graphene ( $\sim 21 \mu F \text{ cm}^{-2}$ ),  $R_f = C_{dl}/21 \mu F \text{ cm}^{-2}$ ; S is surface area of the working electrode, equal to 0.19625 cm<sup>2</sup> in this work.

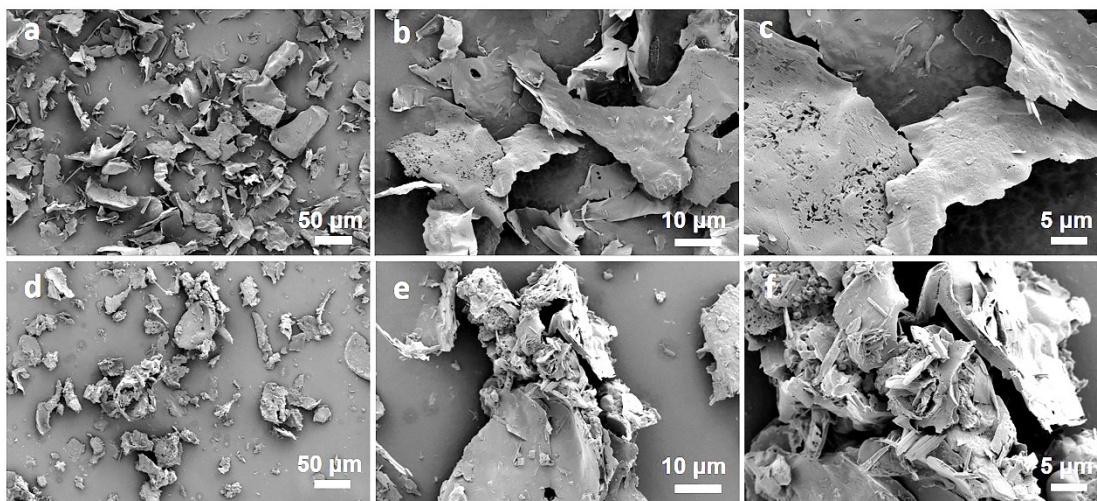

**Fig. S1** Different-magnification SEM images of N-C a-c) and Ni-C d-f).

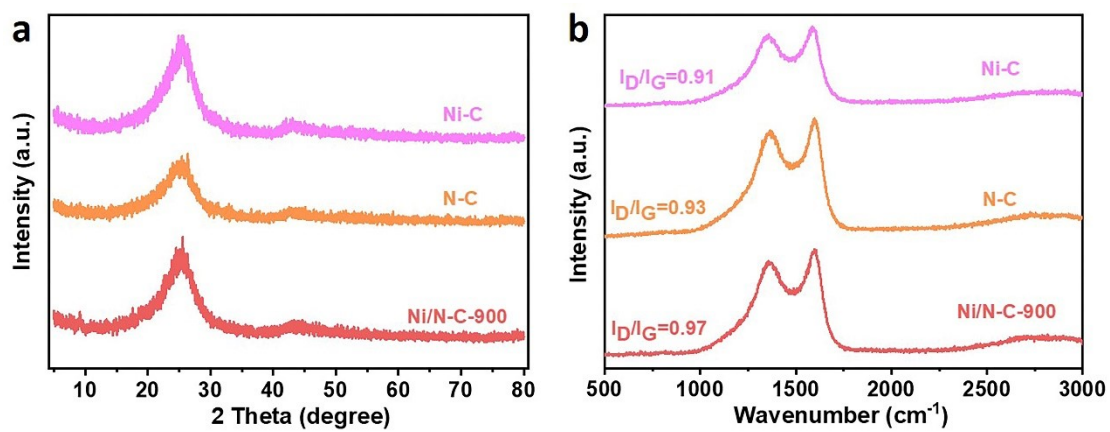

**Fig. S2** (a) X-ray diffraction patterns of Ni/N-C-900, N-C, and Ni-C. (b) Raman spectra of Ni/N-C-900, N-C, and Ni-C.

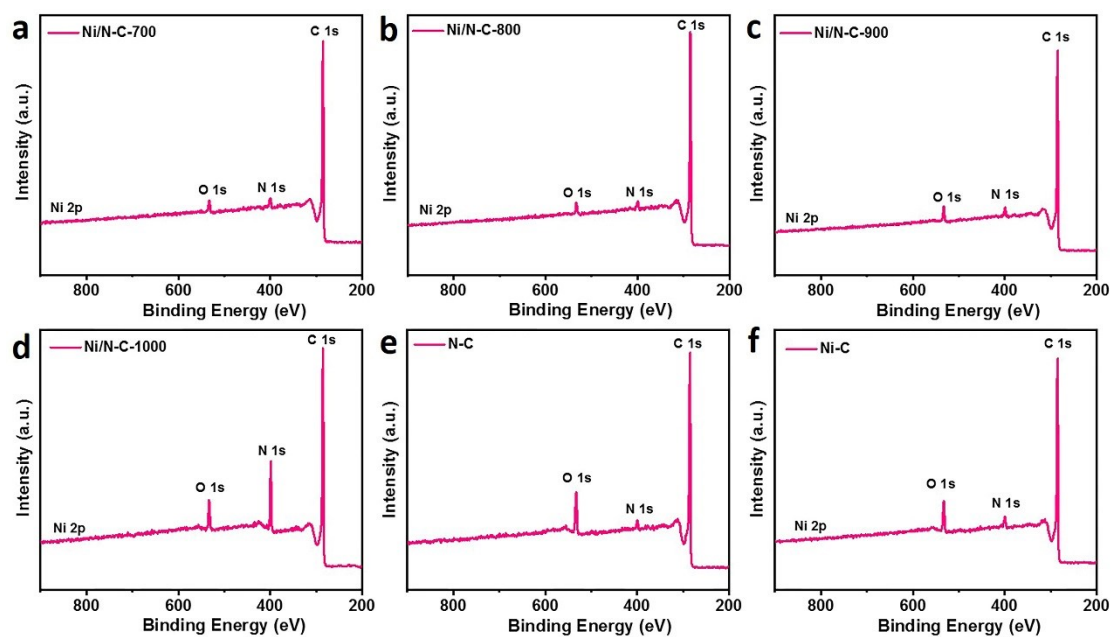

**Fig. S3** XPS survey spectra of Ni/N-C-700 a), Ni/N-C-800 b), Ni/N-C-900 c), Ni/N-C-1000 d), N-C e) and Ni-C f).

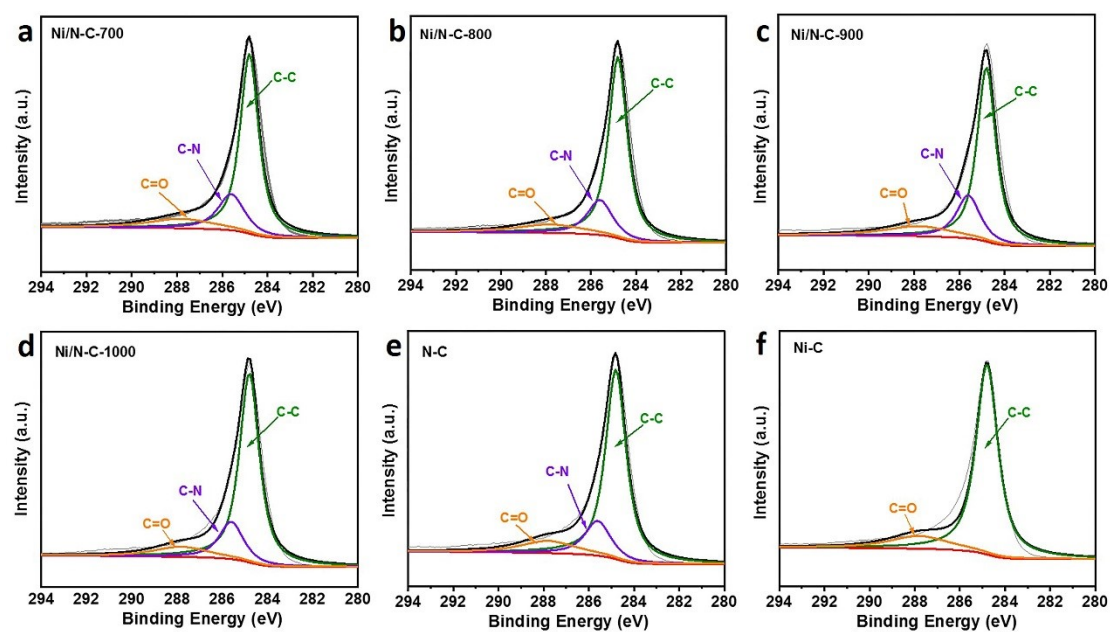

**Fig. S4** C 1s XPS spectra of Ni/N-C-700 a), Ni/N-C-800 b), Ni/N-C-900 c), Ni/N-C-1000 d), N-C e) and Ni-C f).

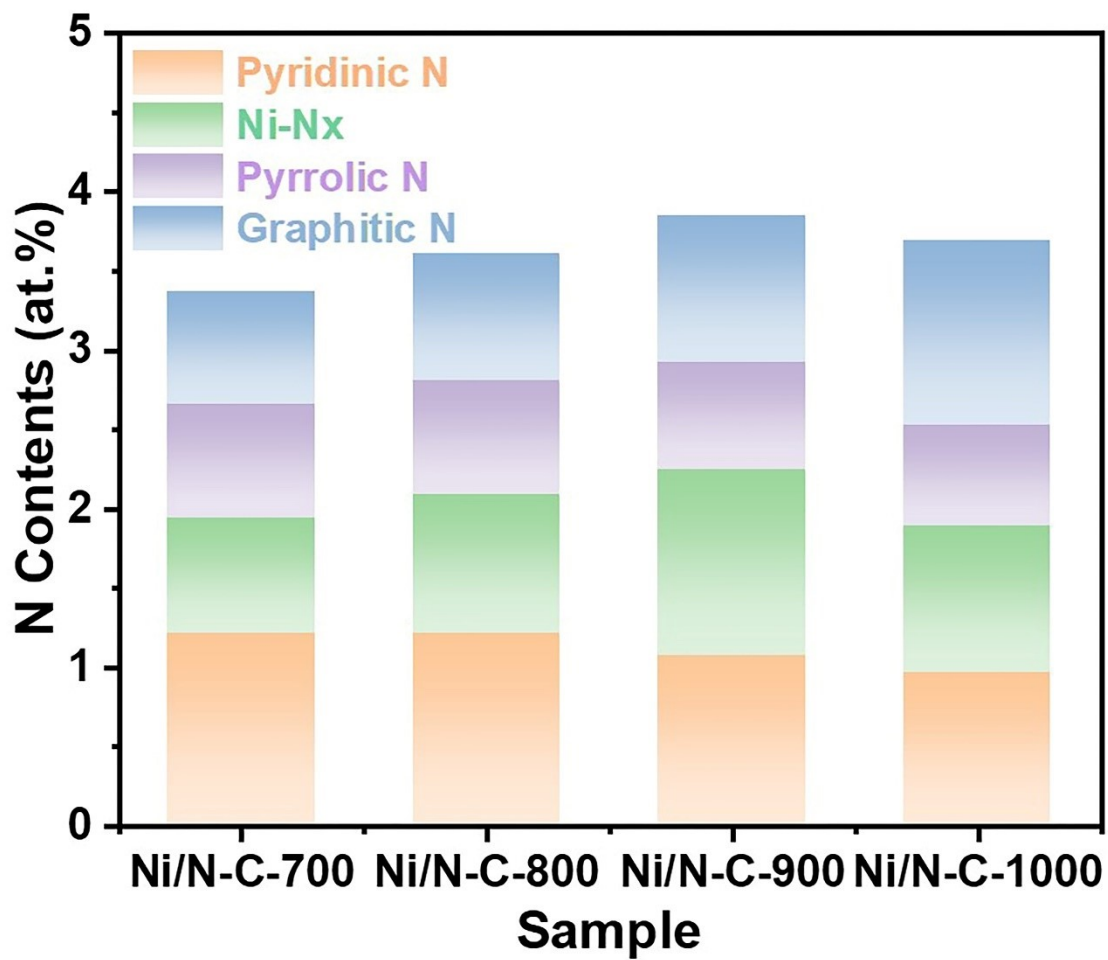

**Fig. S5** The percentage of different N species in Ni/N-C-700, Ni/N-C-800, Ni/N-C-900, and Ni/N-C-1000.



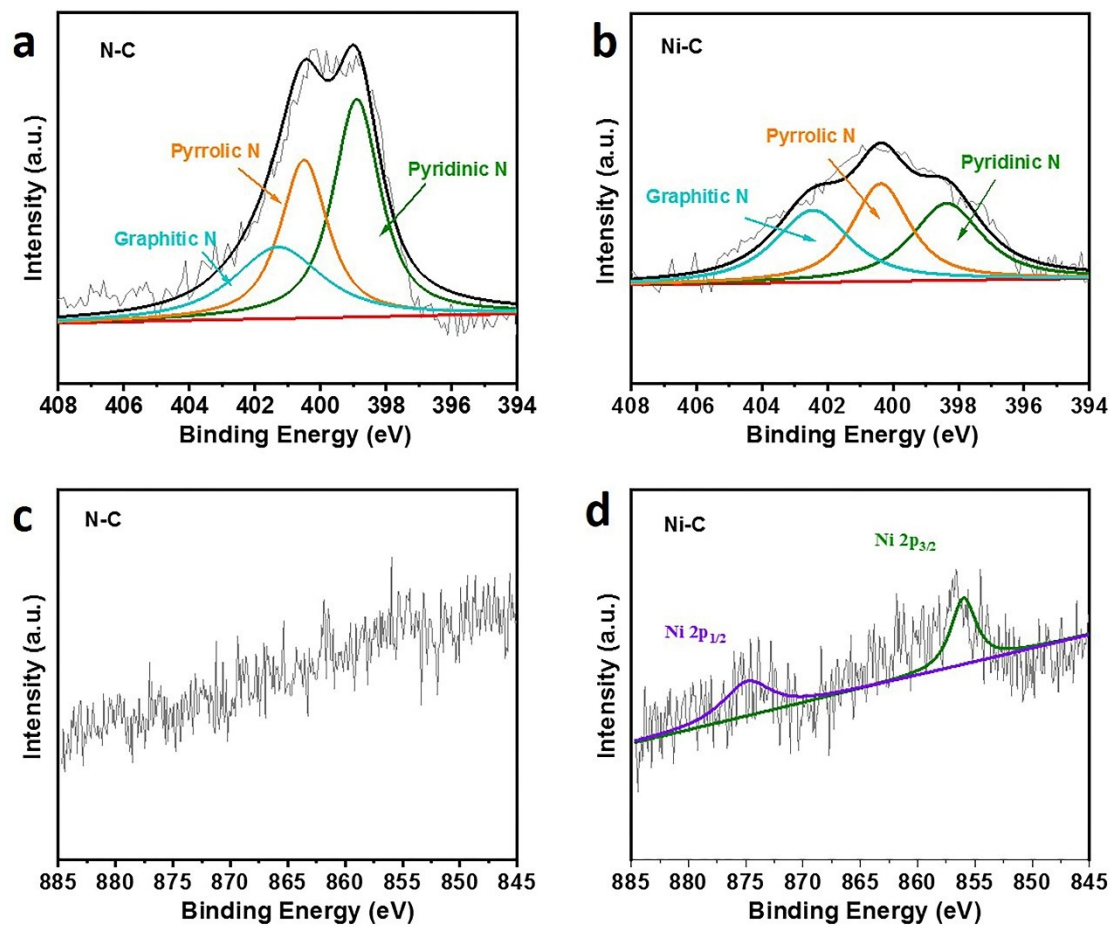

**Fig. S6** High resolution XPS N 1s spectra of N-C a) and Ni-C b); high resolution XPS Ni 2p spectra of N-C c) and Ni-C d).

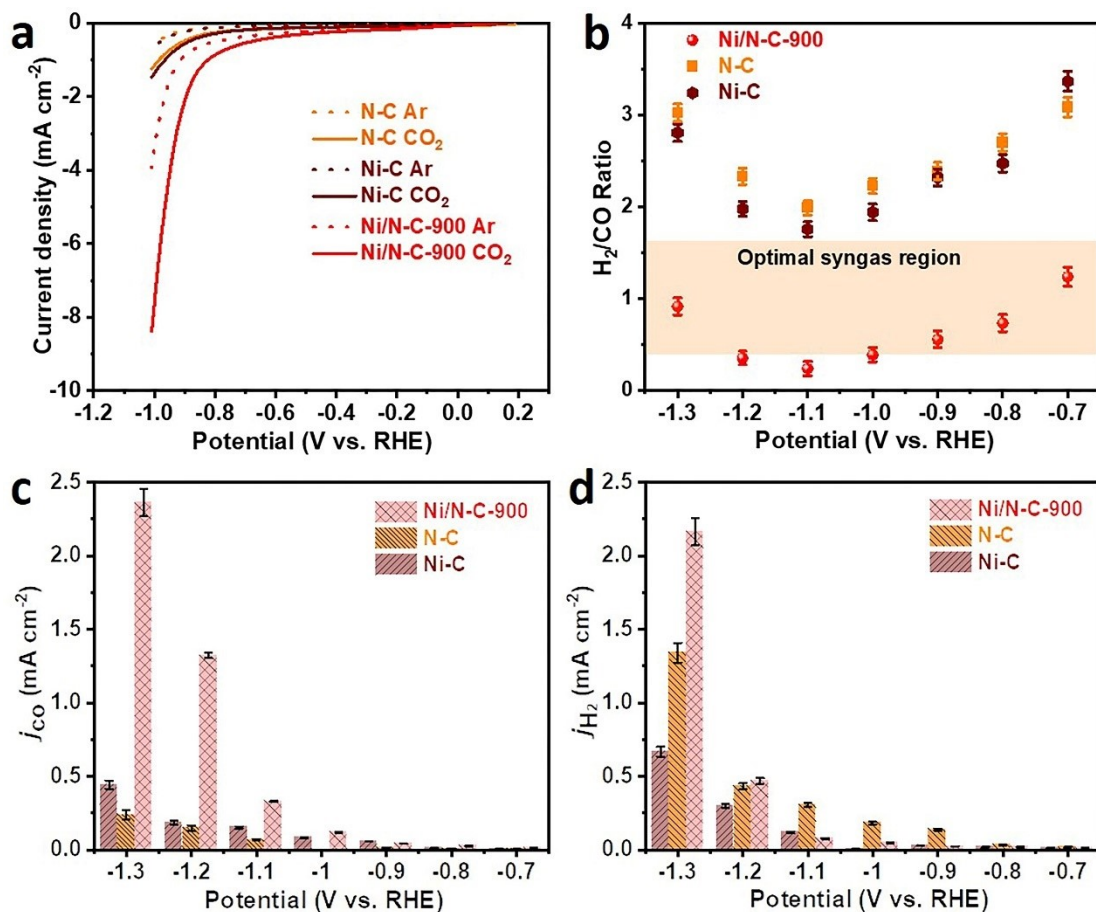

**Fig. S7** (a) Linear sweep voltametric (LSV) curves of various samples at CO<sub>2</sub> and Ar-saturated 0.1 M KHCO<sub>3</sub> solution. (b) Dependence of H<sub>2</sub>/CO ratio with applied potentials and ratios of Ni/N-C-900, N-C and Ni-C. (c) Partial current densities for CO at different applied potentials. (d) Partial current densities for H<sub>2</sub> at different applied potentials.

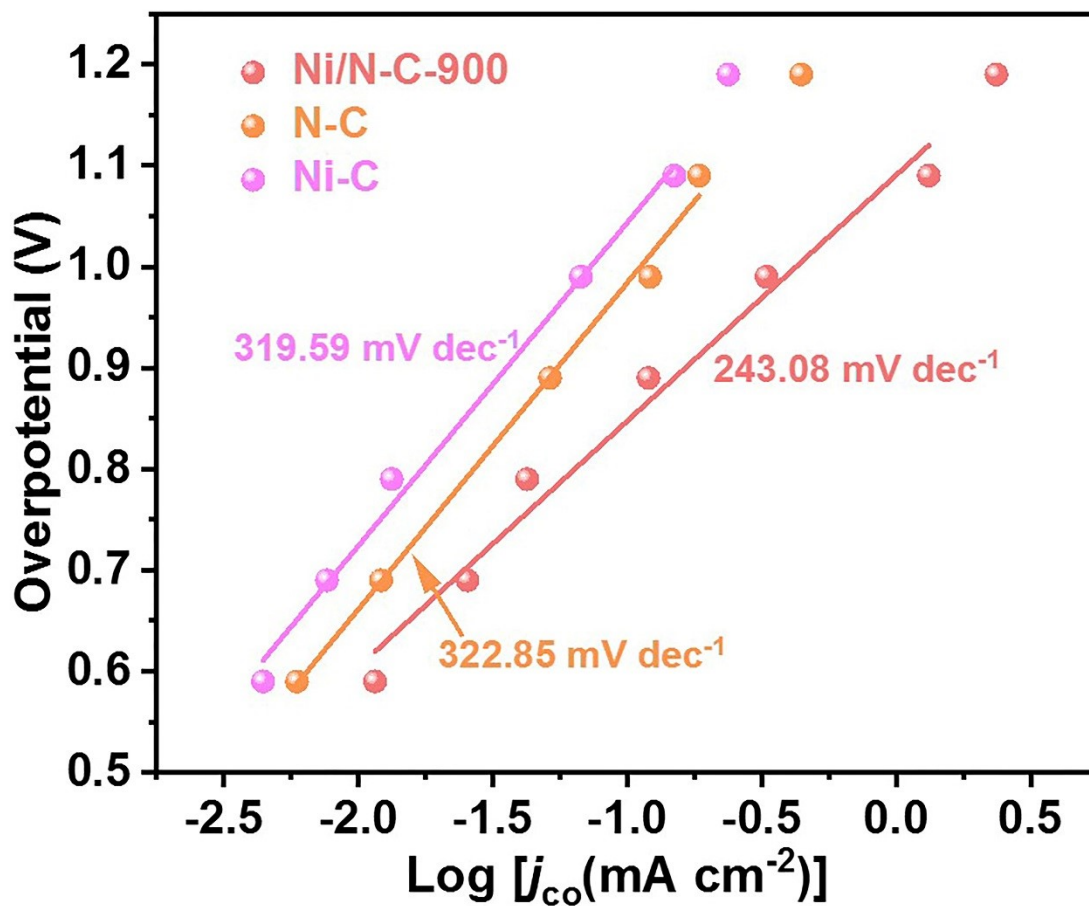

Fig. S8 Tafel plots based on  $j_{CO}$  for Ni/N-C-900, N-C and Ni-C in the CO<sub>2</sub>-saturated KHCO<sub>3</sub> electrolyte.

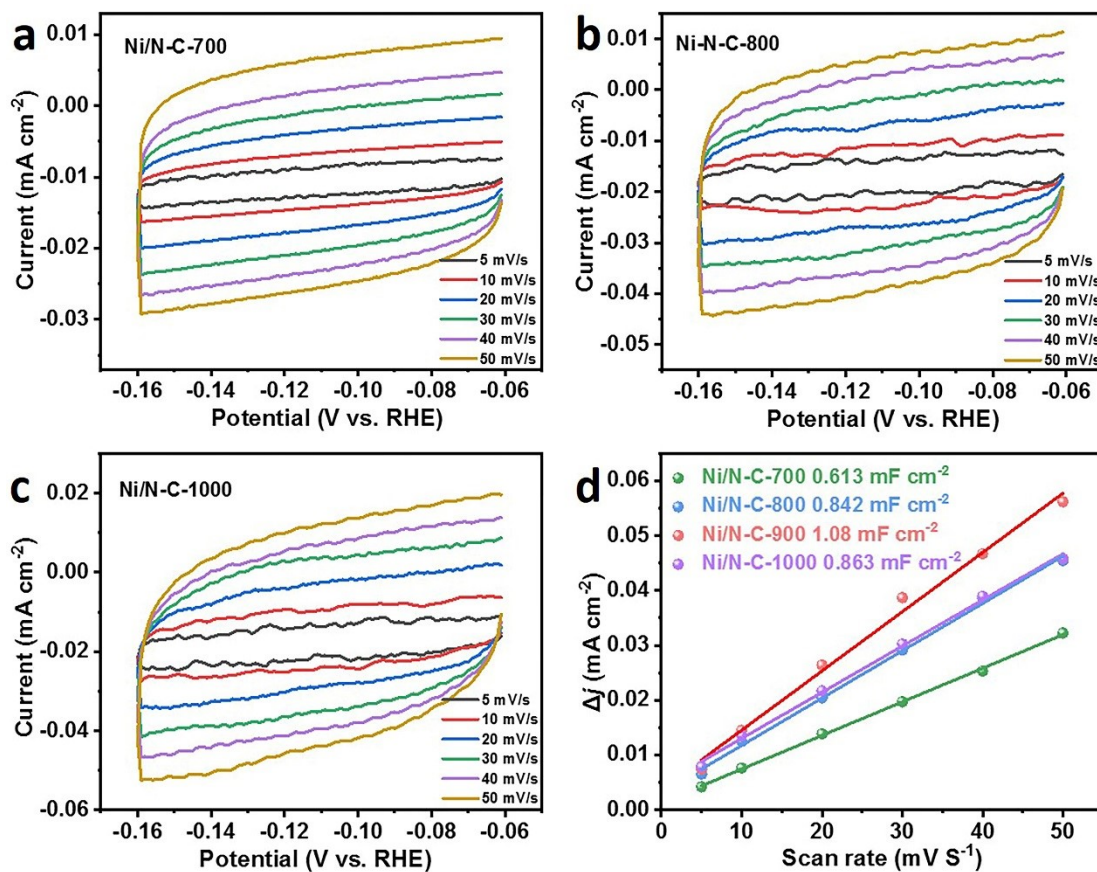

**Fig. S9** Ni/N-C-700 a), Ni/N-C-800 b), Ni/N-C-1000 c) at different scan rates (5, 10, 20, 30, 40 and 50 mV s<sup>-1</sup>). d) The plot of charging current density differences  $\Delta j$  against the scan rate for the calculation of ECSA of various Ni/N-C samples.

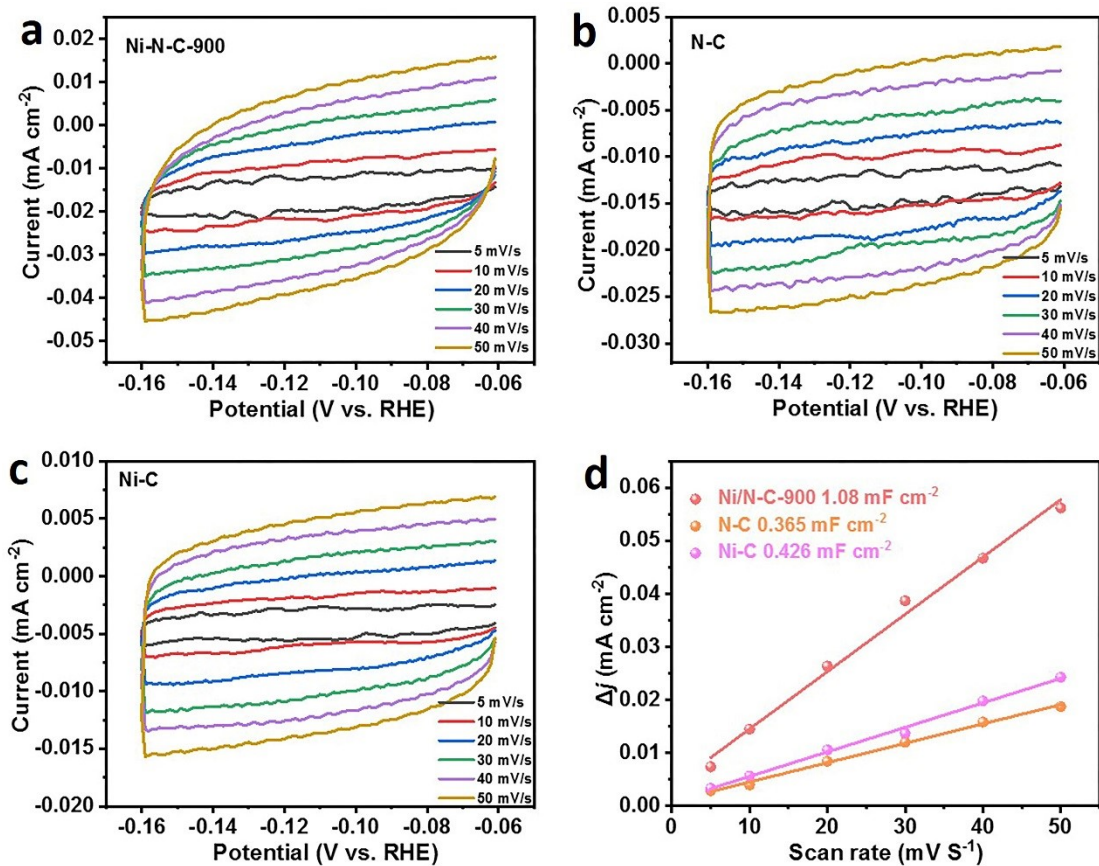

**Fig. S10** Ni/N-C-900 a), N-C b), Ni-C c) at different scan rates (5, 10, 20, 30, 40 and 50  $\text{mV s}^{-1}$ ). d) The plot of charging current density differences  $\Delta j$  against the scan rate for the calculation of ECSA of various samples.

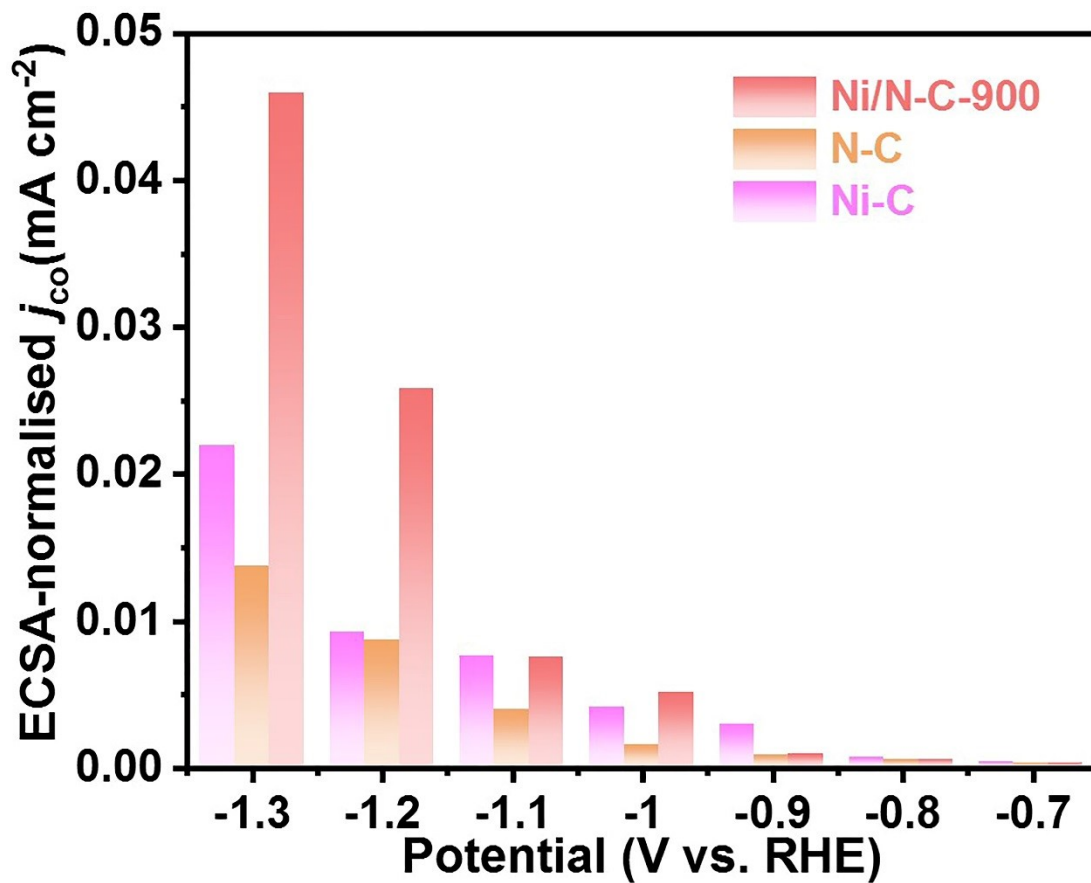

Fig. S11 ECSA-normalised  $j_{\text{Co}}$  of Ni/N-C-900, N-C and Ni-C.

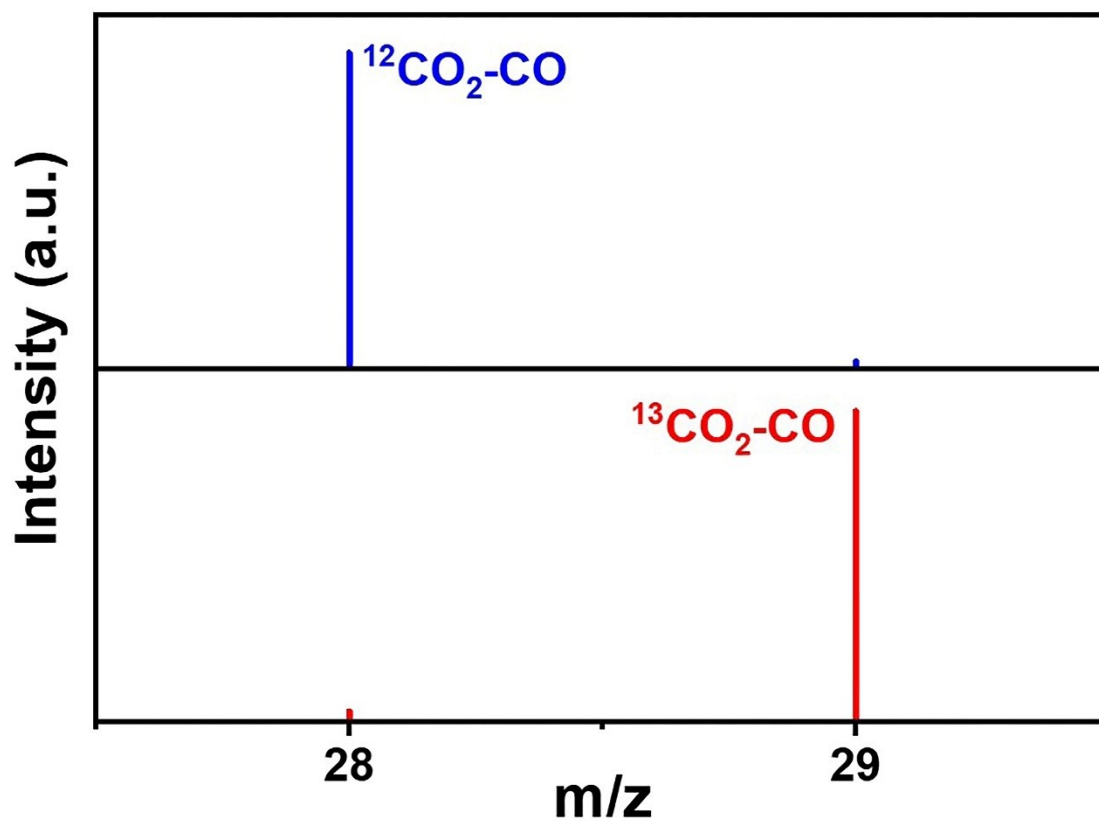

**Fig. S12** Isotopic composition of CO.

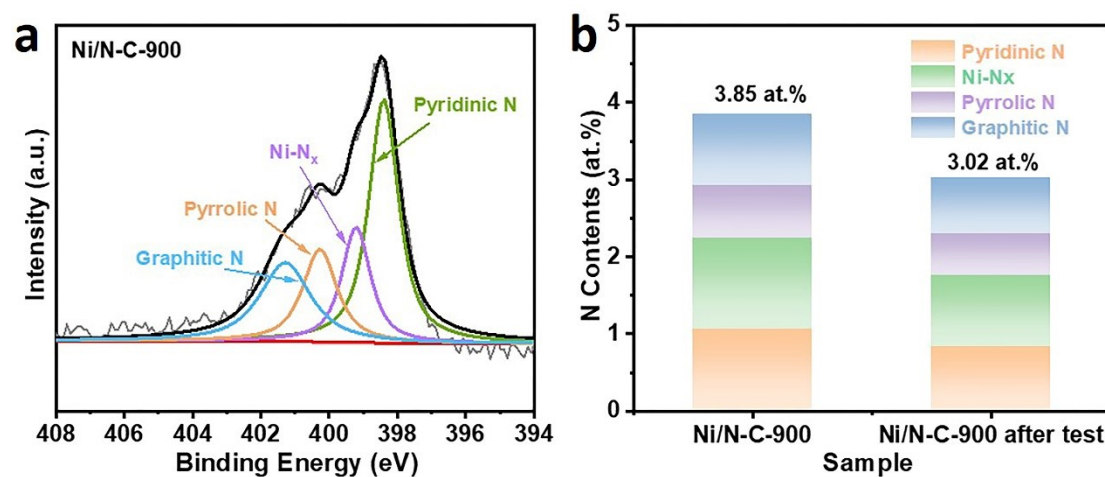

**Fig. S13** (a) The high-resolution XPS spectra of N 1s of Ni/N-C-900 after 10 h test. (b) The content and types of N in Ni/N-C-900 and Ni/N-C-900 after 10 h test.

**Table S1.** Summary of Ni content in different catalysts determined by XPS.

| <b>Catalyst</b> | <b>Ni (at.%)</b> |
|-----------------|------------------|
| Ni/N-C-700      | 0.09             |
| Ni/N-C-800      | 0.10             |
| Ni/N-C-900      | 0.16             |
| Ni/N-C-1000     | 0.13             |
| Ni-C            | 0.07             |

**Table S2.** ICP-OES measurements for Ni weight percent.

| <b>Catalyst</b> | <b>Ni (wt.%)</b> |
|-----------------|------------------|
| Ni/N-C-700      | 0.00230          |
| Ni/N-C-800      | 0.00283          |
| Ni/N-C-900      | 0.00936          |
| Ni/N-C-1000     | 0.00381          |
| Ni-C            | 0.00188          |
